# Supplementary material for: Cost Analysis and Rational Use of Anti Glaucoma Therapy in A Tertiary Hospital&nbsp;in Ghana
Source: Research Square preprint supplement (doi:10.21203/rs.3.rs-284227/v1), 2021-03-08
Supplement: Supplementary file 1 [file 3669d2760638e8ff1a3911fe.docx]

**Impact of the research findings on patients, pharmacy or clinical practice**

1. It raises fundamental issues on resource allocation: - the patient, being told of annual cost of treatment, will plan better with its scarce resources to avoid preventable blindness (Enhance patient adherence)
2. It advocates for policy makers to include the most effective anti-glaucoma therapy in the national health insurance scheme. This will help to reduce the incidences of glaucoma related blindness (affordability & accessibility-rational use of drugs)
3. Variations in the cost of anti-glaucoma medicines may have a long-term impact on glaucoma patients
4. Economic burden of glaucoma therapy and it impact on the patient and the nation as a whole
